# Supplementary material for: Linking Histone Methylation States and hsp Transcriptional Regulation in Thermo-Tolerant and Thermo-Susceptible A. mellifera L. Subspecies in Response to Heat Stress
Source: MDPI journal article supplement (doi:10.3390/insects14030225), 2023-02-24
Supplement: s1 [file s1]

Table S1. Difference $\pm$ SE of enrichment folds of different histone marks at different target genes with the associated P and Q values determined using the Two-stage linear step-up procedure of Benjamini, Krieger and Yekutieli, without assuming a consistent SD.

| Histone mark | Gene name   | JEMENETICA            |           |           | CARNICA              |          |          |
|--------------|-------------|-----------------------|-----------|-----------|----------------------|----------|----------|
|              |             | Difference $\pm$ SE   | P value   | q value   | Difference $\pm$ SE  | P value  | q value  |
| K4m2         | 60KDa HSP   | -0.5350 $\pm$ 0.09046 | 0.004093  | 0.033072  | -0.8700 $\pm$ 0.1535 | 0.004775 | 0.009919 |
| K4m3         | 60KDa HSP   | -3.749 $\pm$ 1.914    | 0.121716  | 0.282304  | -12.10 $\pm$ 3.388   | 0.023339 | 0.028007 |
| K27m2        | 60KDa HSP   | 5.889 $\pm$ 1.805     | 0.030982  | 0.125166  | 7.670 $\pm$ 0.3499   | 0.000026 | 0.000123 |
| K27m3        | 60KDa HSP   | 1.384 $\pm$ 0.7525    | 0.139755  | 0.282304  | 6.645 $\pm$ 1.260    | 0.006200 | 0.009919 |
| K4m2         | 90KDa HSP   | 0.1869 $\pm$ 0.5867   | 0.766039  | 0.459623  | -0.2850 $\pm$ 1.635  | 0.870095 | 0.878796 |
| K4m3         | 90KDa HSP   | -1.184 $\pm$ 0.3867   | 0.037617  | 0.045140  | 4.475 $\pm$ 4.031    | 0.329186 | 0.664956 |
| K27m2        | 90KDa HSP   | 18.48 $\pm$ 0.03485   | <0.000001 | <0.000001 | 69.80 $\pm$ 14.58    | 0.008733 | 0.035281 |
| K27m3        | 90KDa HSP   | 1.054 $\pm$ 0.7839    | 0.250023  | 0.200018  | -1.025 $\pm$ 1.550   | 0.544458 | 0.733204 |
| K4m2         | 28KDa HSP   | 2.371 $\pm$ 2.097     | 0.321538  | 0.096461  | 0.5350 $\pm$ 1.452   | 0.731120 | 0.658008 |
| K4m3         | 28KDa HSP   | 3.119 $\pm$ 0.7860    | 0.016567  | 0.019880  | 4.280 $\pm$ 1.380    | 0.036199 | 0.130317 |
| K27m2        | 28KDa HSP   | 2.399 $\pm$ 0.9961    | 0.073688  | 0.029475  | 33.21 $\pm$ 17.63    | 0.132776 | 0.221984 |
| K27m3        | 28KDa HSP   | 1.137 $\pm$ 0.4255    | 0.055664  | 0.029475  | 2.125 $\pm$ 1.329    | 0.184987 | 0.221984 |
| K4m2         | 83KDa HSP   | 1.273 $\pm$ 0.7620    | 0.170231  | 0.136184  | 96.04 $\pm$ 28.55    | 0.028268 | 0.045229 |
| K4m3         | 83KDa HSP   | -1.843 $\pm$ 0.3964   | 0.009668  | 0.018044  | -12.98 $\pm$ 2.624   | 0.007791 | 0.014684 |
| K27m2        | 83KDa HSP   | 25.80 $\pm$ 6.315     | 0.015037  | 0.018044  | 130.4 $\pm$ 30.04    | 0.012237 | 0.014684 |
| K27m3        | 83KDa HSP   | -2.009 $\pm$ 1.913    | 0.352912  | 0.211747  | -7.298 $\pm$ 4.095   | 0.149254 | 0.105782 |
| K4m2         | 70APKDa HSP | 2.100 $\pm$ 1.563     | 0.250139  | 0.811305  | 26.74 $\pm$ 4.326    | 0.003480 | 0.008353 |
| K4m3         | 70APKDa HSP | -0.2500 $\pm$ 6.186   | 0.969699  | >0.999999 | -0.3900 $\pm$ 0.5103 | 0.487318 | 0.292391 |
| K27m2        | 70APKDa HSP | 4.450 $\pm$ 4.093     | 0.338044  | 0.811305  | 27.57 $\pm$ 2.957    | 0.046228 | 0.055473 |
| K27m3        | 70APKDa HSP | 0.8000 $\pm$ 1.347    | 0.584588  | 0.935341  | 12.48 $\pm$ 5.080    | 0.013466 | 0.008080 |
| K4m2         | NMT         | 0.4436 $\pm$ 0.2170   | 0.110439  | 0.502852  | 14.73 $\pm$ 3.240    | 0.010434 | 0.050083 |
| K4m3         | NMT         | -0.9212 $\pm$ 0.7716  | 0.298518  | 0.502852  | -3.583 $\pm$ 1.330   | 0.054370 | 0.086992 |
| K27m2        | NMT         | 1.592 $\pm$ 1.651     | 0.389426  | 0.502852  | 32.70 $\pm$ 11.05    | 0.041592 | 0.086992 |
| K27m3        | NMT         | 1.828 $\pm$ 2.031     | 0.419043  | 0.502852  | 5.700 $\pm$ 2.598    | 0.093249 | 0.111899 |
| K4m2         | 70cp like   | -4.680 $\pm$ 0.8549   | 0.005419  | 0.021891  | -45.56 $\pm$ 0.9382  | 0.000001 | 0.000003 |
| K4m3         | 70cp like   | -7.030 $\pm$ 3.119    | 0.087246  | 0.114462  | -7.495 $\pm$ 1.389   | 0.005701 | 0.008636 |
| K27m2        | 70cp like   | 14.03 $\pm$ 4.406     | 0.033417  | 0.067502  | 305.6 $\pm$ 74.68    | 0.014943 | 0.015093 |
| K27m3        | 70cp like   | 5.545 $\pm$ 2.743     | 0.113329  | 0.114462  | 8.365 $\pm$ 2.287    | 0.021639 | 0.016391 |
| K4m2         | 10KDa-HSP   | -0.06667 $\pm$ 0.4028 | 0.876563  | 0.885328  | 0.4820 $\pm$ 0.5328  | 0.416789 | 0.315718 |
| K4m3         | 10KDa-HSP   | -1.000 $\pm$ 1.180    | 0.444443  | 0.598517  | 0.6732 $\pm$ 0.08052 | 0.001119 | 0.003390 |
| K27m2        | 10KDa-HSP   | -42.70 $\pm$ 34.28    | 0.280941  | 0.567500  | -4.609 $\pm$ 1.697   | 0.053207 | 0.080609 |
| K27m3        | 10KDa-HSP   | 21.93 $\pm$ 8.661     | 0.064496  | 0.260564  | 4.186 $\pm$ 2.825    | 0.212619 | 0.214746 |
